# Supplementary material for: Copper(i) and silver(i) complexes of anthraldehyde thiosemicarbazone: synthesis, structure elucidation, in vitro anti-tuberculosis/cytotoxic activity and interactions with DNA/HSA
Source: Royal Society of Chemistry journal article supplement (doi:10.1039/d0dt03104f), 2020-01-01
Supplement: d0dt03104f1.pdf [file d0dt03104f1.pdf]

# **Copper(I) and silver(I) complexes of anthraldehyde thiosemicarbazone: Synthesis, structure elucidation, *in vitro* anti-tuberculosis/cytotoxicity activity and interactions with DNA/HSA**

Ashiq Khan<sup>a</sup>, Kamaldeep Paul<sup>b</sup>, Iqbal Singh<sup>b</sup>, Jerry P. Jasinski<sup>c</sup>, Victoria A. Smolenski, Ethan P. Hotchkiss<sup>c</sup>, Patrick T. Kelley<sup>c</sup>, Zachary A. Shalit<sup>c</sup>, Manpreet Kaur<sup>c</sup>, Somesh Banerjee<sup>d</sup>, Partha Roy<sup>d</sup>, Rekha Sharma<sup>a,□</sup>

<sup>a</sup>Department of Chemistry, Lovely Professional University, Phagwara, Punjab, India

<sup>b</sup>School of Chemistry and Biochemistry, Thapar Institute of Engineering & Technology, Patiala 147004, Punjab, India

<sup>c</sup>Department of Chemistry, Keene State College, 229 Main Street, Keene, NH 03435–2001, US

<sup>d</sup>Department of Biotechnology, Indian Institute of Technology Roorkee, Roorkee 247667, Uttarakhand

## **Supporting Information**

**Table S1.** Binding constants for the interaction of ligand (**H<sup>2</sup>L**), copper complexes (**2**, **6** and **8**) and silver complexes (**9** and **10**) with ct-DNA

| Compound              | K <sub>b</sub> (×10 <sup>4</sup> M <sup>-1</sup> ) | R      |
|-----------------------|----------------------------------------------------|--------|
| <b>H<sup>2</sup>L</b> | 1.40                                               | 0.9859 |
| <b>2</b>              | 6.66                                               | 0.9129 |
| <b>6</b>              | 3.06                                               | 0.9716 |
| <b>8</b>              | 3.62                                               | 0.9834 |
| <b>9</b>              | 4.08                                               | 0.9830 |
| <b>10</b>             | 4.60                                               | 0.9881 |

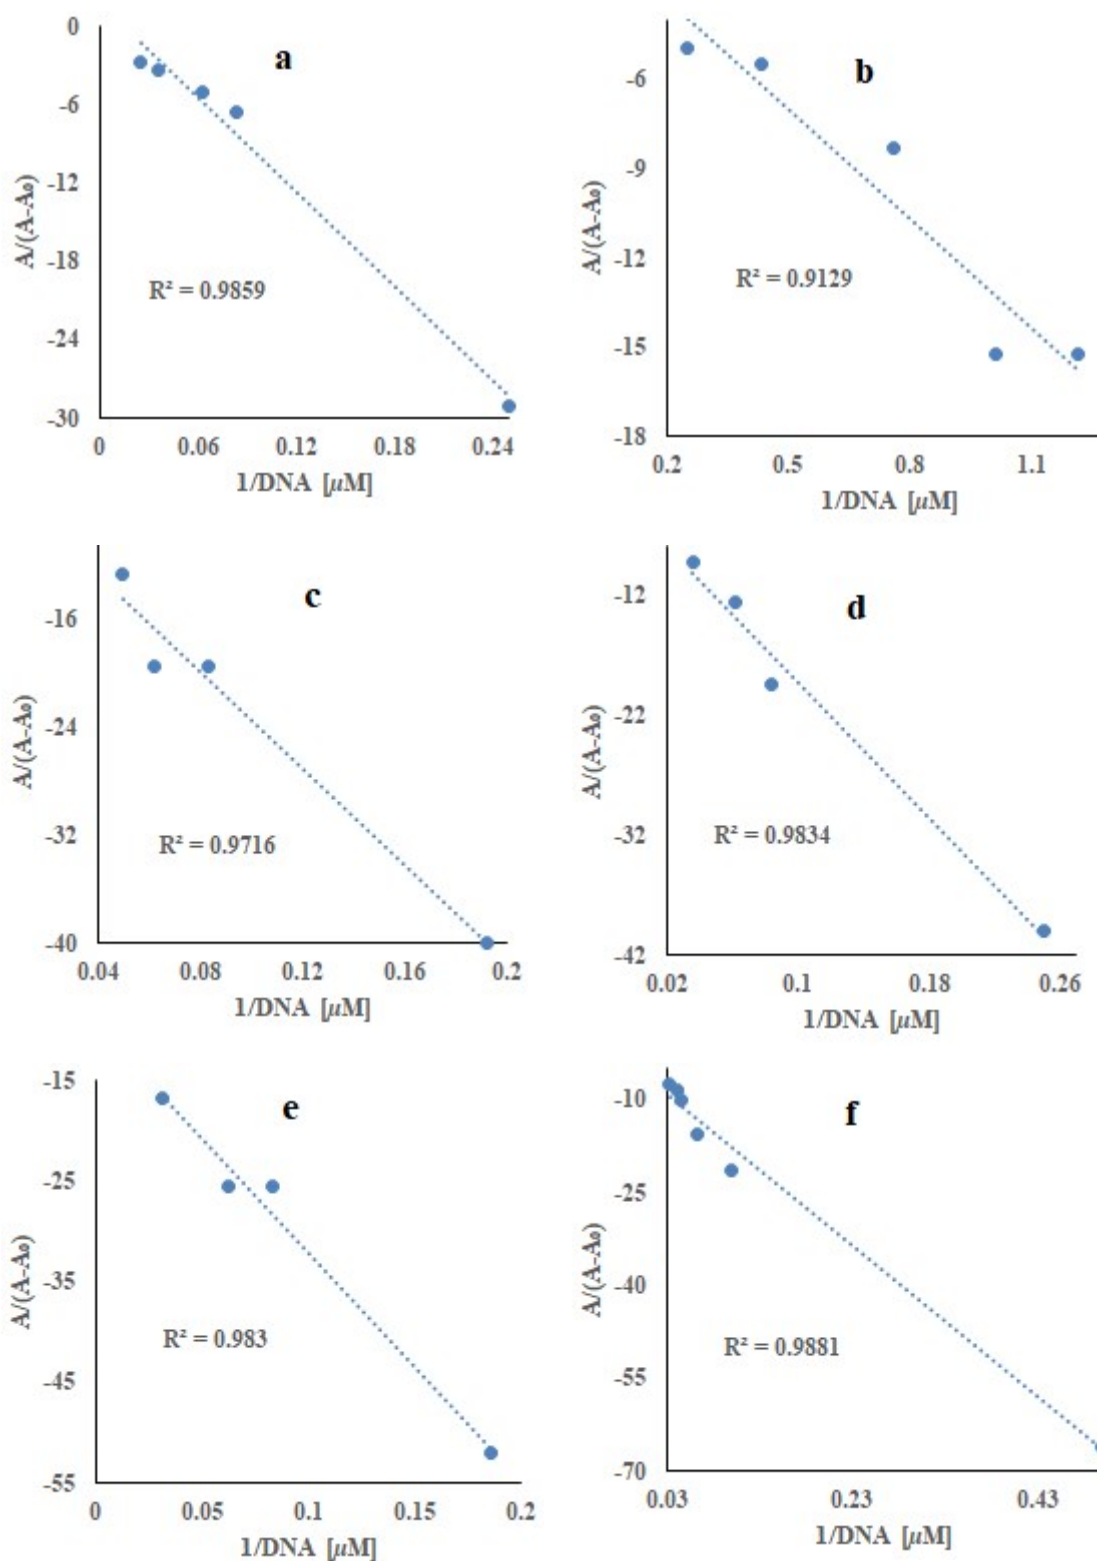

**Figure S1.** Benesi-Hildebrand plots:  $\{A/(A-A_0)$  versus  $1/\text{DNA } [\mu\text{M}]\}$  of absorption spectra of ligand (10  $\mu\text{M}$ )  $\text{H}^2\text{L}$  (a); and complexes **2** (b); **6** (c); **8** (d); **9** (e) and **10** (f) with increasing concentrations of ct-DNA.

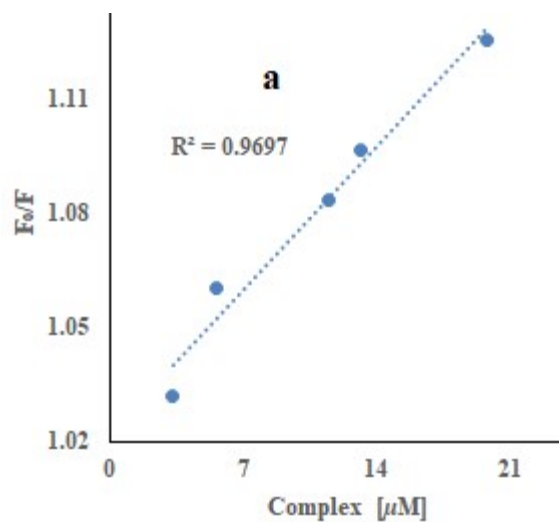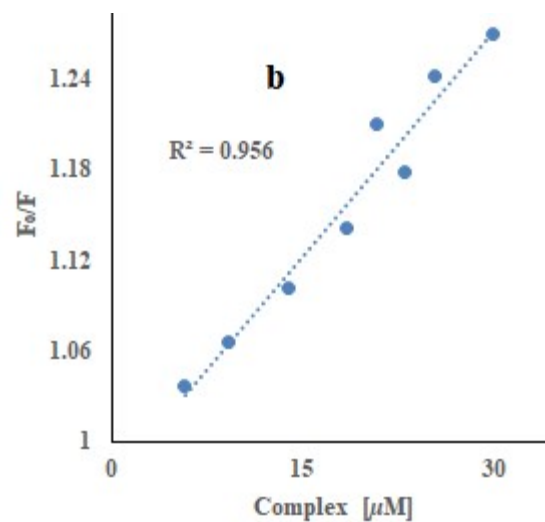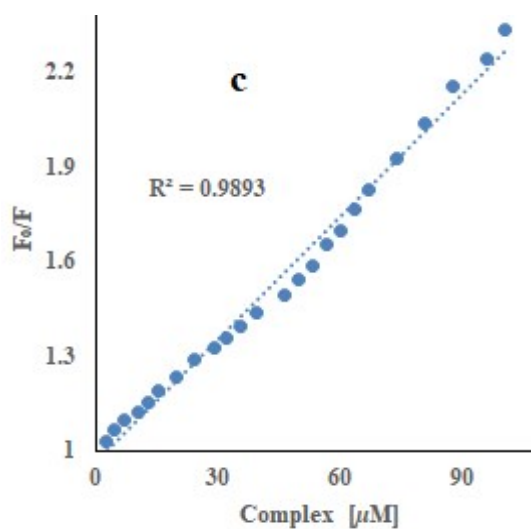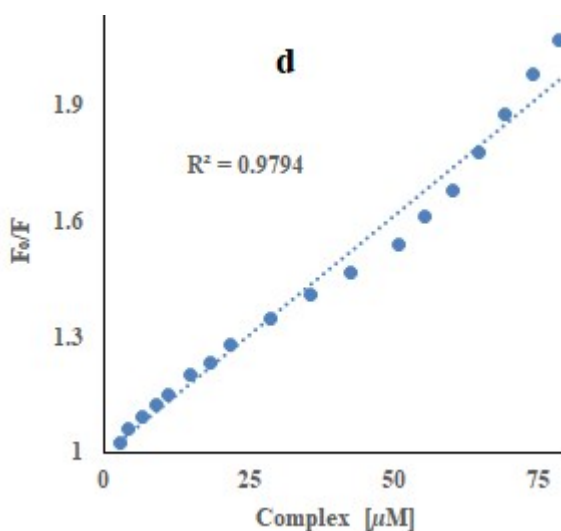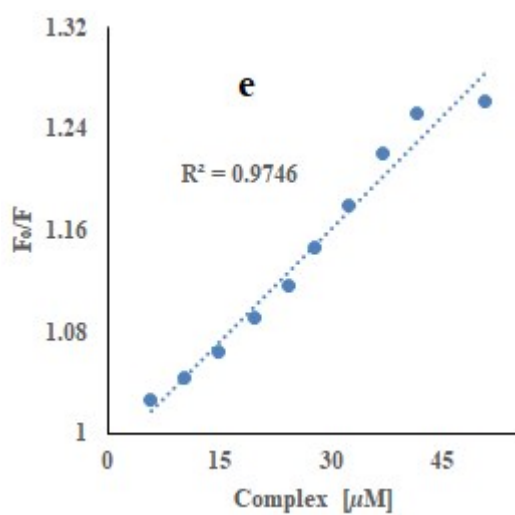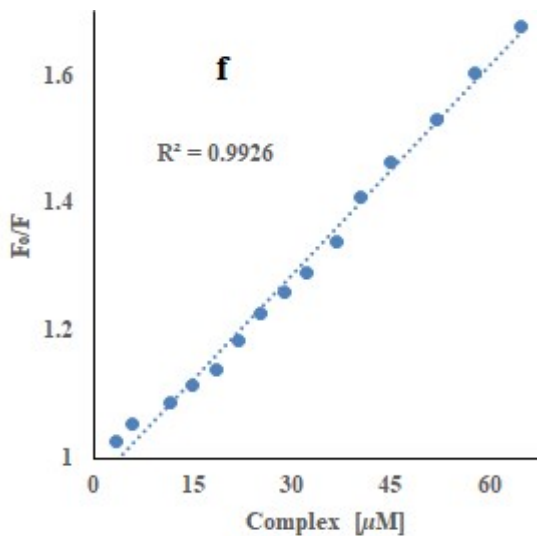

**Figure S2.** Stern-Volmer plots { $F_0/F$  versus [complex]} of emission spectra of EB ( $1\ \mu\text{M}$ ) bound to ct-DNA ( $10\ \mu\text{M}$ ) in the absence and increasing concentrations of the ligand **H<sup>2</sup>L** (a); and complexes **2** (b); **6** (c); **8** (d); **9** (d) and **10** (f).

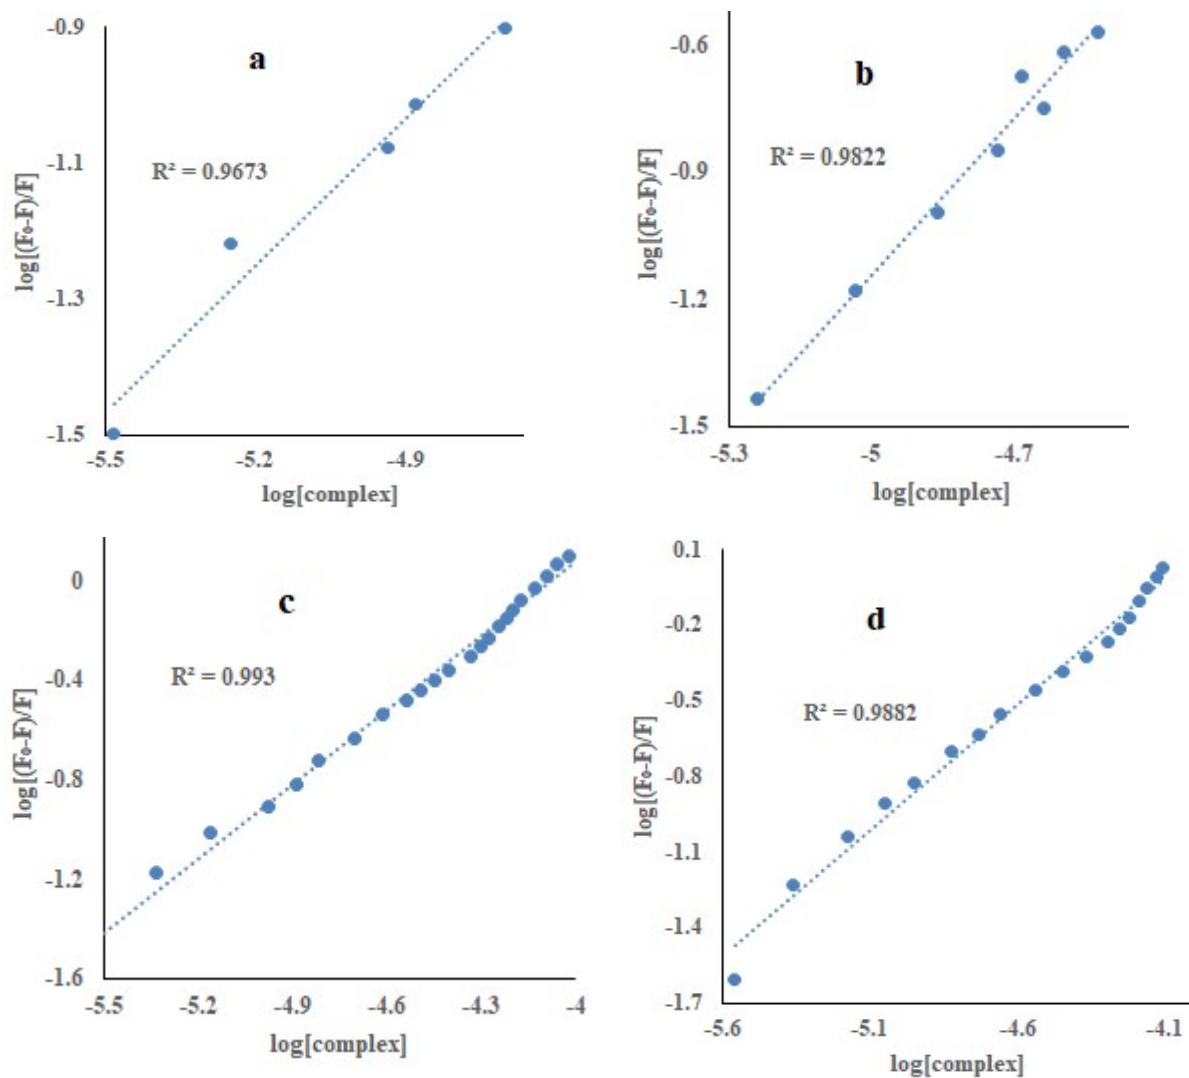

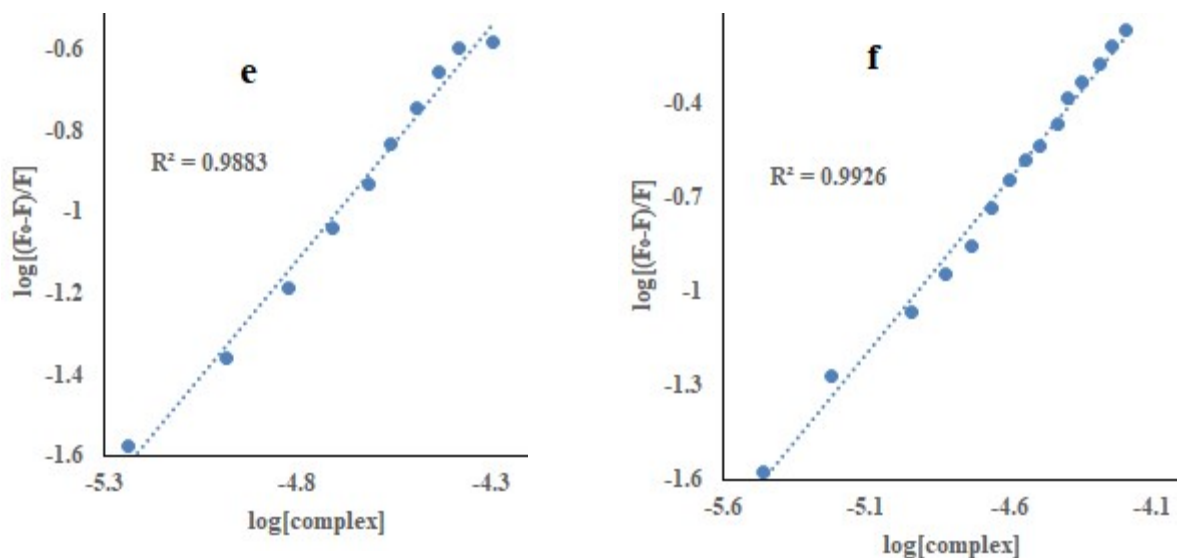

**FigureS3.** Modified Stern-Volmer plots  $\{\log[(F_0-F)/F]$  versus  $\log[\text{complex}]\}$  of emission spectra of EB ( $1 \mu\text{M}$ ) bound to ct-DNA ( $10 \mu\text{M}$ ) in the absence and increasing concentrations of the ligand **H<sup>2</sup>L** (a); and complexes **2** (b); **6** (c); **8** (d); **9** (d) and **10** (f).

**Table S2.** Binding constants for the interaction of HSA with ligand (**H<sup>2</sup>L**), copper complex (**2**, **6** and **8**) and silver complex (**9** and **10**).

| Compound              | $K_b$ ( $\times 10^5 \text{ M}^{-1}$ ) | $^bR$  |
|-----------------------|----------------------------------------|--------|
| <b>H<sup>2</sup>L</b> | 0.50                                   | 0.9833 |
| <b>2</b>              | 3.28                                   | 0.9636 |
| <b>6</b>              | 2.41                                   | 0.9699 |
| <b>8</b>              | 2.20                                   | 0.9780 |
| <b>9</b>              | 2.82                                   | 0.9751 |
| <b>10</b>             | 3.06                                   | 0.9661 |

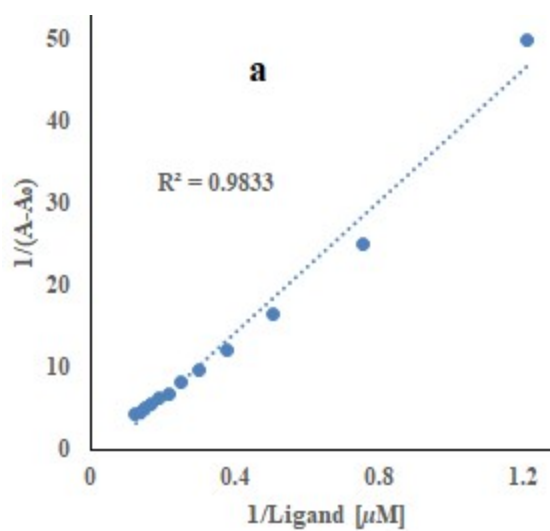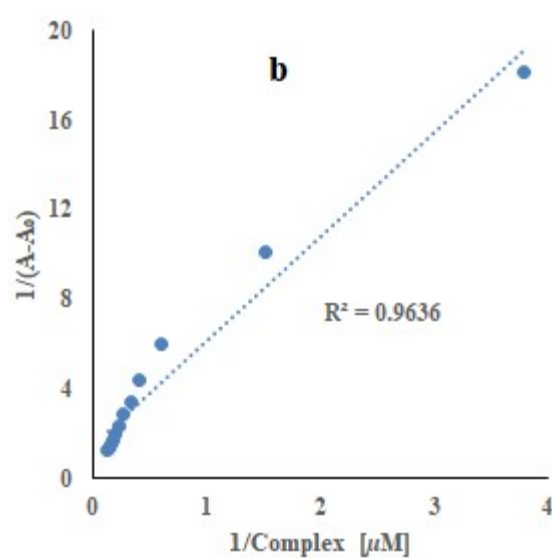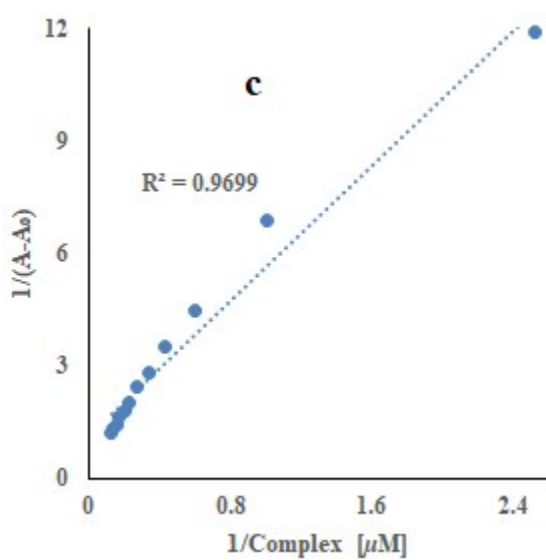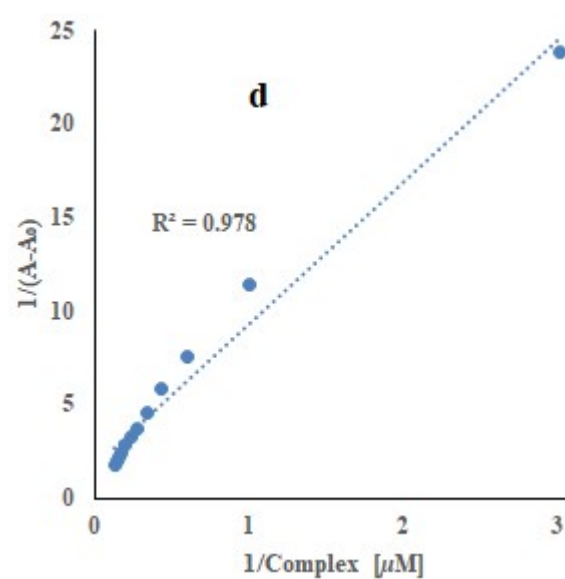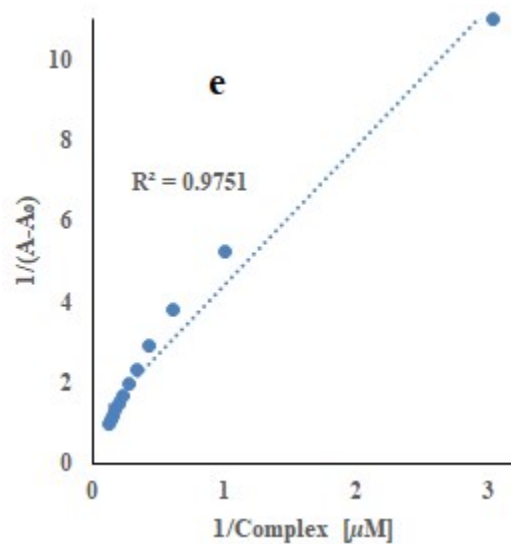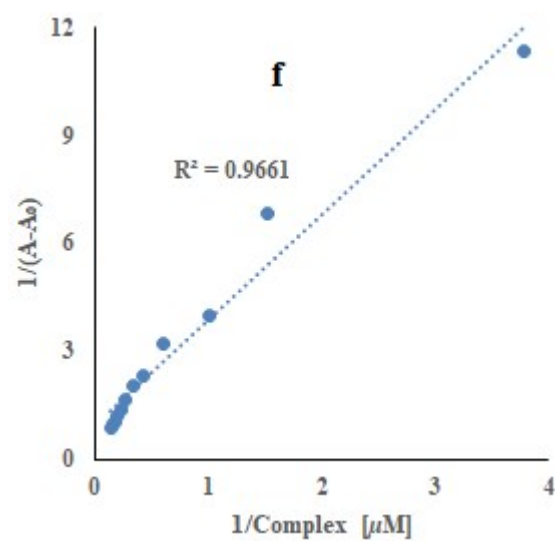

**Figure S4.** Benesi-Hildebrand plots:  $\{1/(A-A_0) \text{ versus } 1/\text{complex } [\mu\text{M}]\}$  of absorption spectra of HSA ( $10 \mu\text{M}$ ) with increasing concentrations of ligand **H<sup>2</sup>L** (a) and complexes **2** (b); **6** (c); **8** (d); **9** (e) and **10** (f).

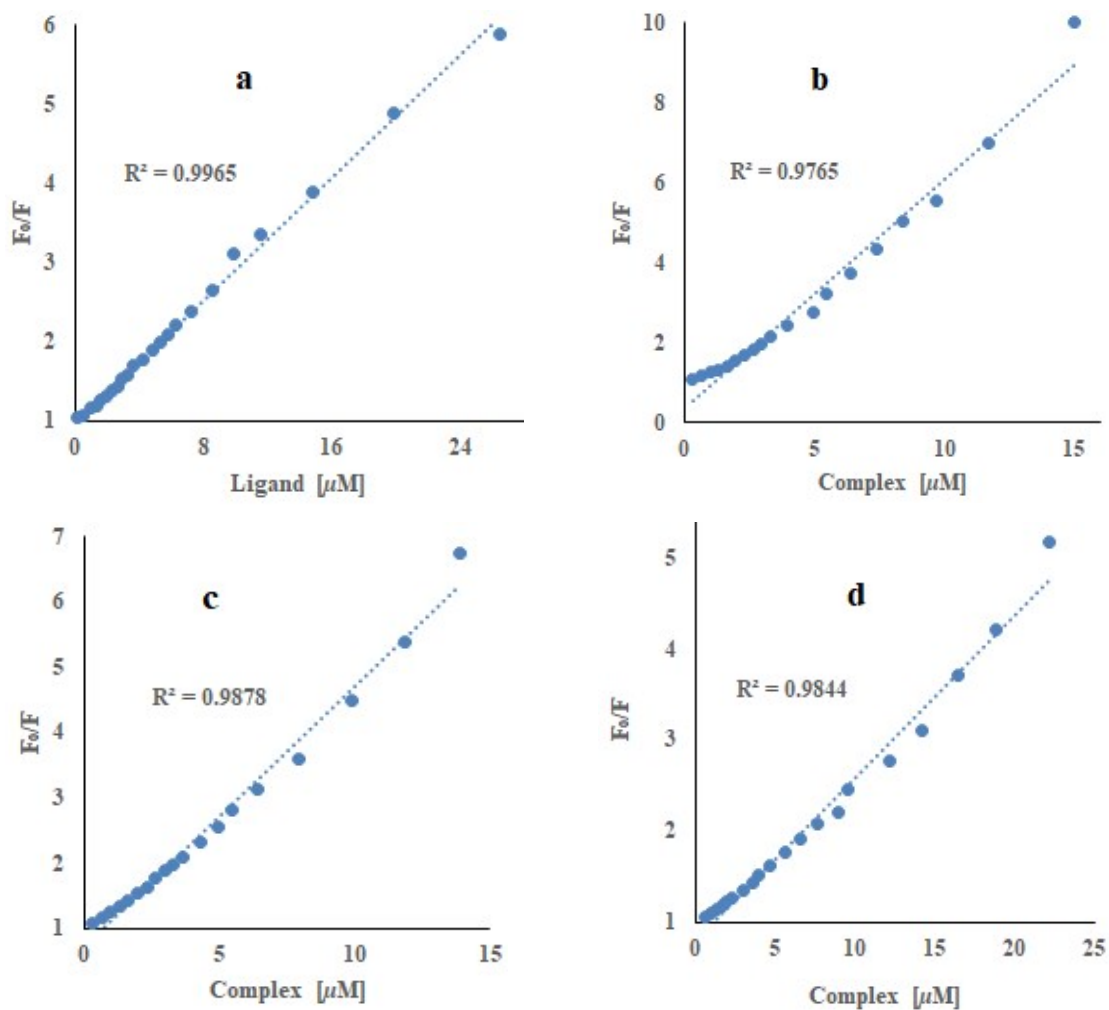

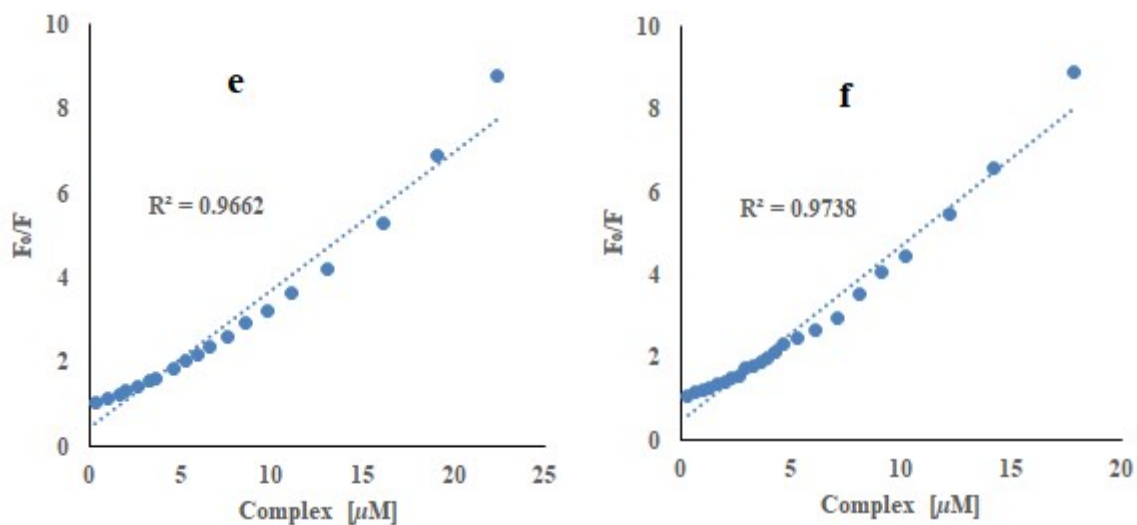

**Figure S5.** Stern-Volmer plots  $\{F_0/F \text{ versus } [\text{complex}]\}$  of emission spectra of HSA ( $10 \mu\text{M}$ ) in the absence and increasing concentrations of the ligand  $\text{H}^2\text{L}$  (a) and complexes 2 (b); 6 (c); 8 (d); 9 (d) and 10 (f).

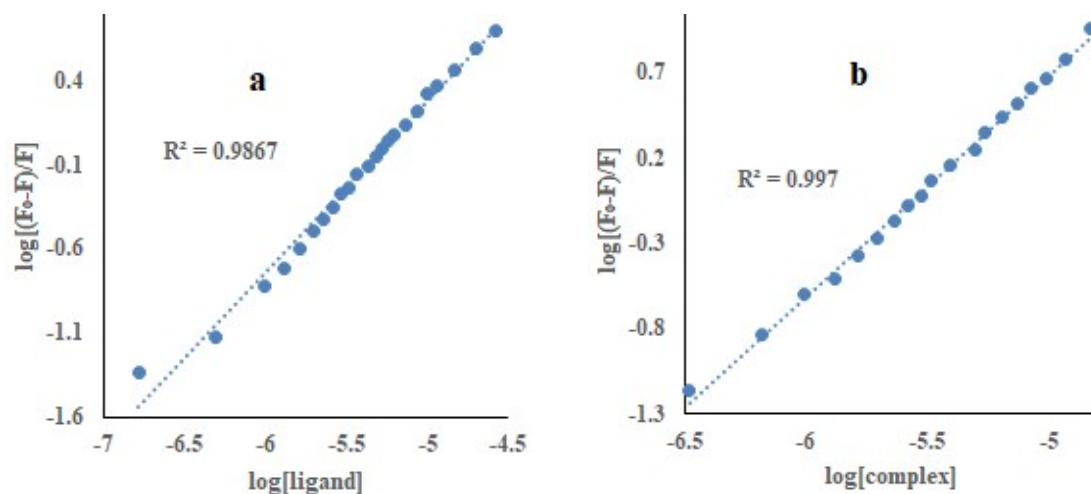



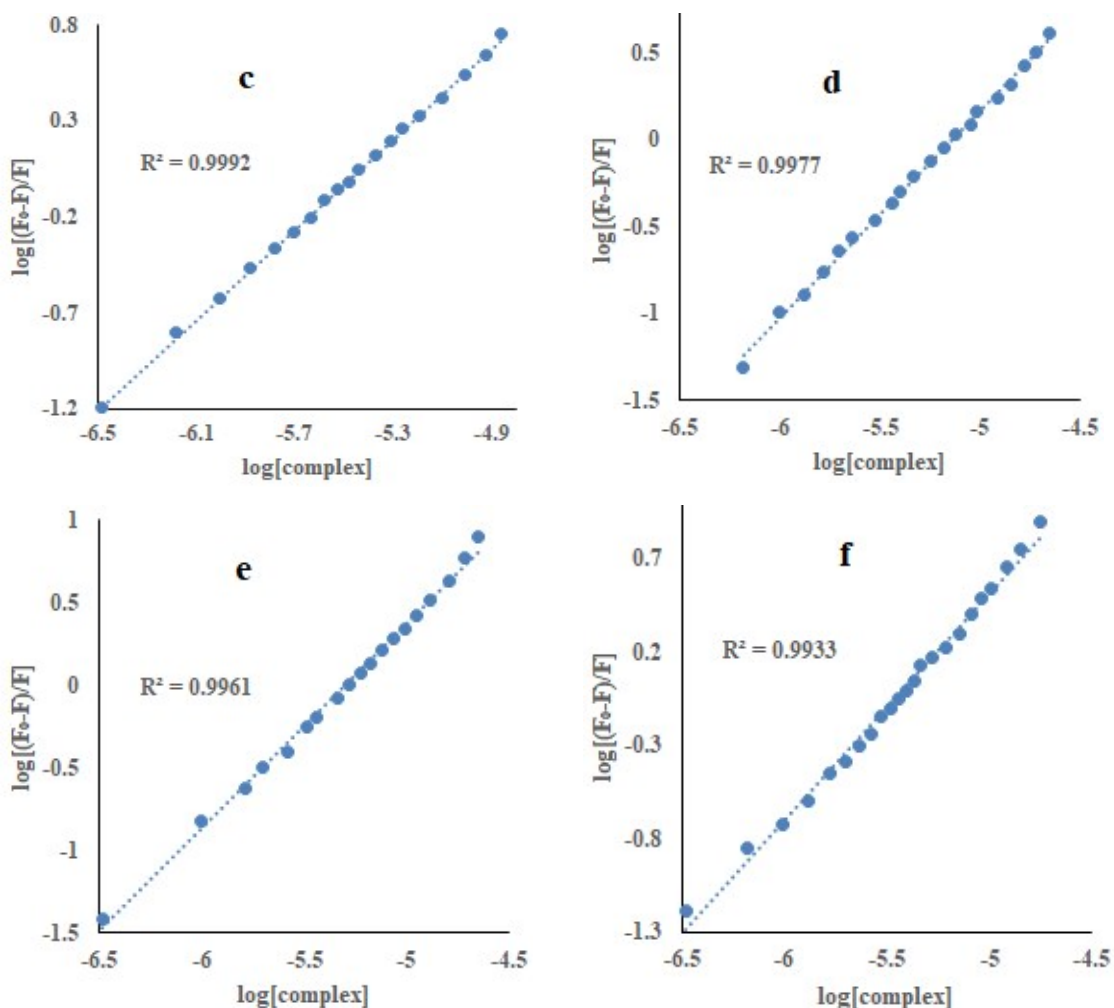

**FigureS6.** Modified Stern-Volmer plots  $\{\log[(F_o-F)/F]$  versus  $\log[\text{complex}]\}$  of emission spectra of HSA ( $10 \mu\text{M}$ ) in the absence and increasing concentrations of the ligand **H<sup>2</sup>L** (a) and complexes**2** (b); **6** (c); **8** (d); **9** (d) and **10** (f).

**Table S3.** The docking results based on the binding free energies (kcal/mol) of ligand **H<sup>2</sup>L**, and complexes**2** and **6** docked into 1BNA and RMSD from the co-crystallized ligand

| Mode | H <sup>2</sup> L       |             | 2                      |             | 6                      |             |
|------|------------------------|-------------|------------------------|-------------|------------------------|-------------|
|      | Affinity<br>(kcal/mol) | RMSD<br>(Å) | Affinity<br>(kcal/mol) | RMSD<br>(Å) | Affinity<br>(kcal/mol) | RMSD<br>(Å) |
| 1    | -7.1                   | 0.000       | -8.1                   | 0.000       | -5.9                   | 0.000       |
| 2    | -6.3                   | 22.560      | -8.0                   | 0.568       | -5.7                   | 15.175      |
| 3    | -6.0                   | 2.126       | -7.7                   | 0.911       | -5.6                   | 15.146      |
| 4    | -6.0                   | 3.244       | -7.7                   | 1.725       | -5.6                   | 13.431      |
| 5    | -5.9                   | 3.651       | -7.6                   | 1.003       | -5.6                   | 0.430       |

|   |      |        |      |       |      |        |
|---|------|--------|------|-------|------|--------|
| 6 | -5.9 | 22.565 | -7.6 | 0.678 | -5.5 | 0.443  |
| 7 | -5.9 | 3.188  | -7.6 | 1.758 | -5.5 | 0.548  |
| 8 | -5.8 | 25.636 | -7.5 | 1.769 | -5.5 | 13.999 |
| 9 | -5.8 | 3.100  | -7.5 | 1.800 | -5.5 | 0.420  |

**Table S4.** The docking results based on the binding free energies (kcal/mol) of complexes **8**, **9** and **10** docked into 1BNA and RMSD from the co-crystallized ligand

| Mode | 8                      |             | 9                      |             | 10                     |             |
|------|------------------------|-------------|------------------------|-------------|------------------------|-------------|
|      | Affinity<br>(kcal/mol) | RMSD<br>(Å) | Affinity<br>(kcal/mol) | RMSD<br>(Å) | Affinity<br>(kcal/mol) | RMSD<br>(Å) |
| 1    | -6.4                   | 0.000       | -6.4                   | 0.000       | -5.9                   | 0.000       |
| 2    | -6.4                   | 0.346       | -6.3                   | 1.966       | -5.8                   | 0.756       |
| 3    | -6.4                   | 0.437       | -6.3                   | 0.946       | -5.7                   | 2.307       |
| 4    | -6.4                   | 0.362       | -6.3                   | 0.676       | -5.7                   | 14.521      |
| 5    | -6.3                   | 2.180       | -6.3                   | 2.016       | -5.6                   | 7.969       |
| 6    | -6.2                   | 2.203       | -6.3                   | 0.664       | -5.6                   | 2.271       |
| 7    | -6.2                   | 0.869       | -6.3                   | 3.248       | -5.6                   | 14.086      |
| 8    | -6.1                   | 2.126       | -6.3                   | 1.946       | -5.6                   | 2.365       |
| 9    | -6.0                   | 3.229       | -6.3                   | 6.895       | -5.5                   | 14.176      |

**Table S5.** The H-bonding of compounds **H<sup>2</sup>L**, **2**, **6**, **7**, **8**, **9** and **10** with DNA docked into 1BNA

| Comp.                 | DNA bases                         | ligand                                        | Bond<br>length (Å) |
|-----------------------|-----------------------------------|-----------------------------------------------|--------------------|
| <b>H<sup>2</sup>L</b> | DG-16 (chain B) (O4' of guanine)  | NH of ligand (attached with CH <sub>3</sub> ) | 2.49               |
|                       | DC-15 (chain B) (O2 of cytosine)  | NH of ligand (attached with CH <sub>3</sub> ) | 2.75               |
|                       | DC-15 (chain B) (O2 of cytosine)  | NH of ligand (attached with N)                | 2.53               |
|                       | DC-11 (chain A) (O2 of cytosine)  | NH of ligand (attached with N)                | 2.89               |
|                       | DG-16 (chain B) (H3 of guanine)   | N of ligand (attached with =CH)               | 3.03               |
| <b>2</b>              | DG-4 (chain A) (H21 of guanine)   | N of ligand (attached with =CH)               | 2.93               |
|                       | DG-4 (chain A) H22 of guanine)    | N of ligand (attached with =CH)               | 2.66               |
|                       | DC-23 (chain B) (O4' of cytosine) | NH <sub>2</sub> of ligand                     | 2.13               |

|           |                                    |                                               |      |
|-----------|------------------------------------|-----------------------------------------------|------|
|           | DA-6 (chain A) (OP1 of phosphate)  | NH <sub>2</sub> of ligand                     | 2.46 |
| <b>6</b>  | DC-3 (chain A) (O2 of cytosine)    | NH of ligand (attached with CH <sub>3</sub> ) | 2.38 |
|           | DG-4 (chain A) (O4' of guanine)    | NH of ligand (attached with CH <sub>3</sub> ) | 2.73 |
| <b>8</b>  | DG-4 (chain A) (OP4 of phosphate)  | NH of ligand (attached with CH <sub>3</sub> ) | 2.14 |
|           | DA-17 (chain B) (OP2 of phosphate) | NH of ligand (attached with CH <sub>3</sub> ) | 2.96 |
| <b>9</b>  | DG-4 (chain A) (OP2 of phosphate)  | NH of ligand (attached with CH <sub>3</sub> ) | 2.13 |
|           | DA-17 (chain B) (OP2 of phosphate) | NH of ligand (attached with CH <sub>3</sub> ) | 2.96 |
|           | DC-3 (chain A) (OP1 of phosphate)  | NH of ligand (attached with CH <sub>3</sub> ) | 3.60 |
|           | DA-18 (chain B) (OP2 of phosphate) | NH of ligand (attached with CH <sub>3</sub> ) | 3.75 |
| <b>10</b> | DA-5 (chain A) (H7 of adenine)     | Triphenyl ring system                         | 2.90 |
